# Supplementary material
Source: ML conference proceedings conference paper supplement (https://proceedings.neurips.cc/paper_files/paper/2019/hash/3c88c1db16b9523b4dcdcd572aa1e16a-Abstract.html)
Supplement: Supplementary file 2 [file 3c88c1db16b9523b4dcdcd572aa1e16a-Supplemental.zip]

Archive with 1 entries (1 files):
- NeurIPS_2019_Camera_Ready_Version_supp.pdf
